# Supplementary material for: Acoustofluidic Interfaces for the Mechanobiological Secretome of MSCs
Source: PubMed Central journal article supplement (PMC10665559; doi:10.1038/s41467-023-43239-6), 2023-11-22
Supplement: 41467_2023_43239_MOESM1_ESM.pdf [file 41467_2023_43239_MOESM1_ESM.pdf]

## Supplementary Information

### **AIMS: Acoustofluidic Interfaces for the Mechanobiological Secretome of MSCs**

Ye He<sup>1</sup>, Shujie Yang<sup>1</sup>, Pengzhan Liu<sup>1</sup>, Ke Li<sup>1</sup>, Ke Jin<sup>1</sup>, Ryan Becker<sup>2</sup>, Jinxin Zhang<sup>1</sup>,  
Chuanchuan Lin<sup>3</sup>, Jianping Xia<sup>1</sup>, Zhehan Ma<sup>2</sup>, Zhiteng Ma<sup>1</sup>, Ruoyu Zhong<sup>1</sup>, Luke P.  
Lee<sup>4,5,6\*</sup>, and Tony Jun Huang<sup>1\*</sup>

<sup>1</sup>Thomas Lord Department of Mechanical Engineering and Materials Science, Duke University, Durham, NC 27708, USA

<sup>2</sup>Department of Biomedical Engineering, Duke University, Durham, NC 27708, USA

<sup>3</sup>Department of Blood Transfusion, Irradiation Biology Laboratory, Xinqiao Hospital, Chongqing, 400037, China

<sup>4</sup>Harvard Medical School, Harvard University; Renal Division and Division of Engineering in Medicine, Department of Medicine, Brigham and Women's Hospital, Boston, MA 02115, USA

<sup>5</sup>Department of Bioengineering, Department of Electrical Engineering and Computer Science, University of California, Berkeley, Berkeley, CA 94720, USA

<sup>6</sup>Department of Biophysics, Institute of Quantum Biophysics, Sungkyunkwan University, Suwon, Korea

\* Corresponding authors: L.P.L and T.J.H. (email: lplee@bwh.harvard.edu; tony.huang@duke.edu)

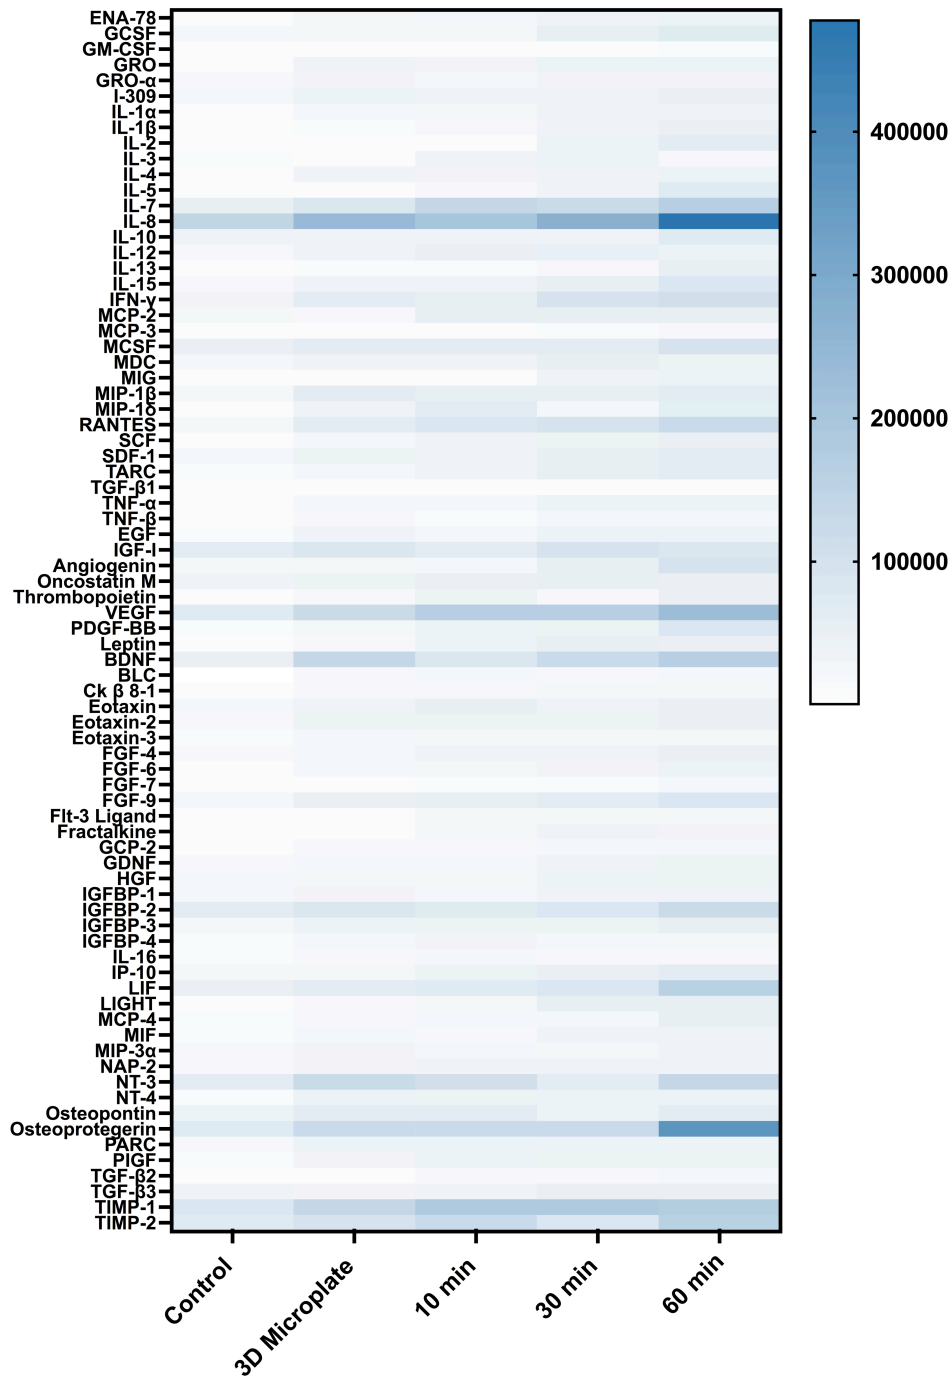

**Supplementary Figure 1** | Heatmap presenting the integrated densities of different groups after incubating with the cytokine array for 4 days (without Z-score normalization and clustering process). Source data are provided as a Source Data file.

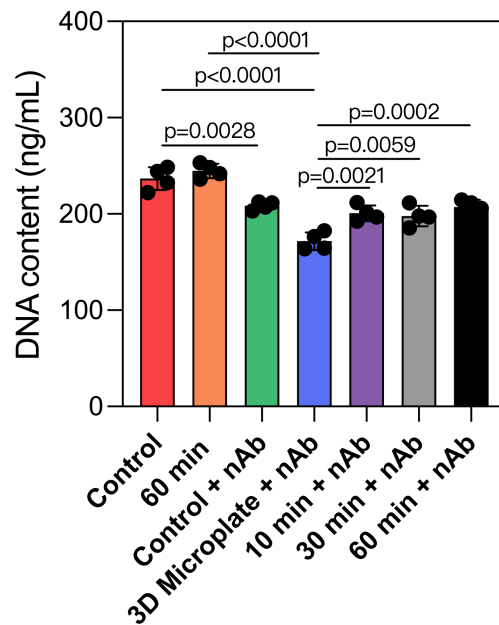

**Supplementary Figure 2** | CyQUANT™ Cell Proliferation Assay measuring the DNA contents after functional blocking of N-cadherin of MSCs and incubating for 4 days. Data are graphed as the mean  $\pm$  SD (n=4, biological repeats). The statistical analysis was performed using one-way ANOVA with Tukey's post-hoc test by GraphPad Prism 9.0. Source data are provided as a Source Data file.

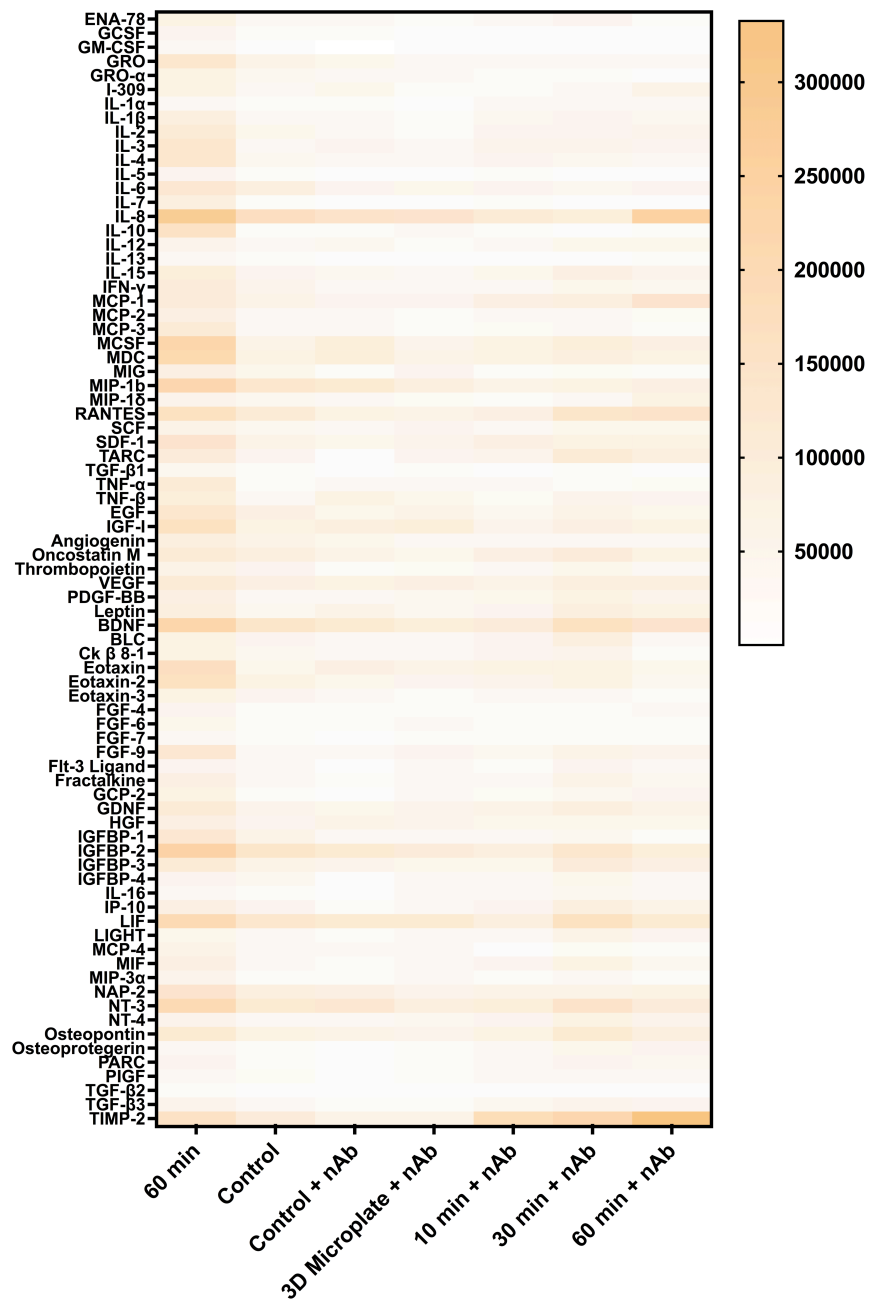

**Supplementary Figure 3** | Heatmap presenting the integrated densities of different groups after functional blocking N-cadherin of MSCs and incubating with the cytokine array for 4 days (without Z-score normalization and clustering process). Source data are provided as a Source Data file.

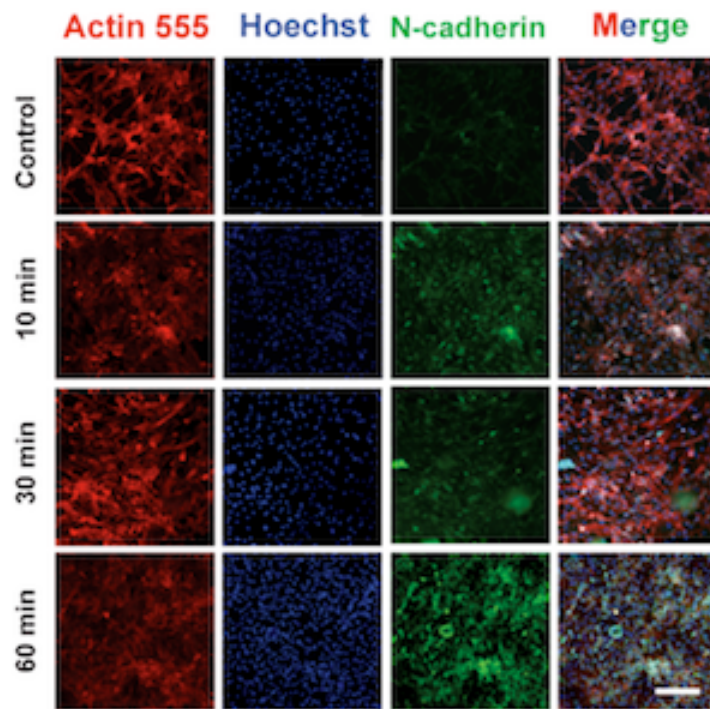

**Supplementary Figure 4** | Representative immunofluorescence images of different groups after incubating for 3 days. The expression of N-cadherin is shown in green. The cytoskeleton is shown in red. The cell nucleus is shown in blue. n=3 tests. Scale bar: 50  $\mu$ m.

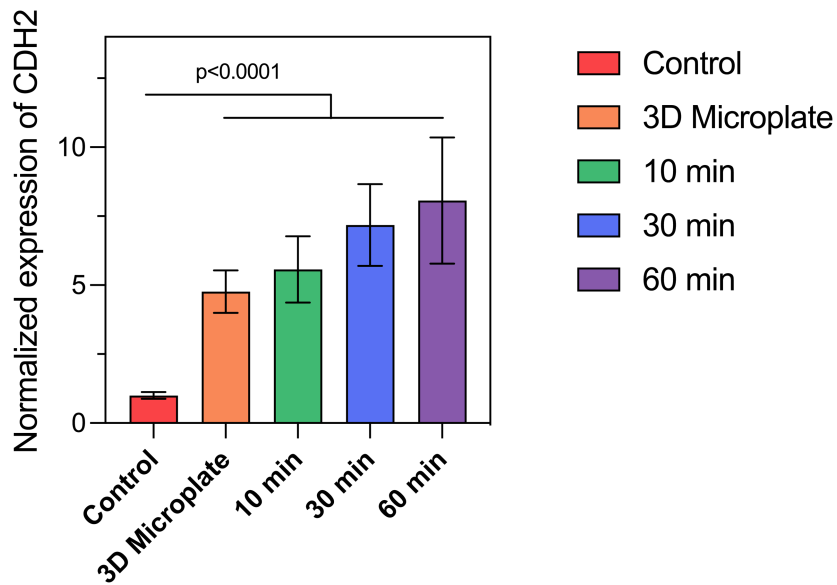

**Supplementary Figure 5** | QPCR measuring the relative expression of CDH2 gene (N-cadherin) of different groups after incubating for 3 days. Data are graphed as the mean  $\pm$  SD (n=3, biological repeats). The statistical analysis was performed using one-way ANOVA with Tukey's post-hoc test by GraphPad Prism 9.0. Source data are provided as a Source Data file.

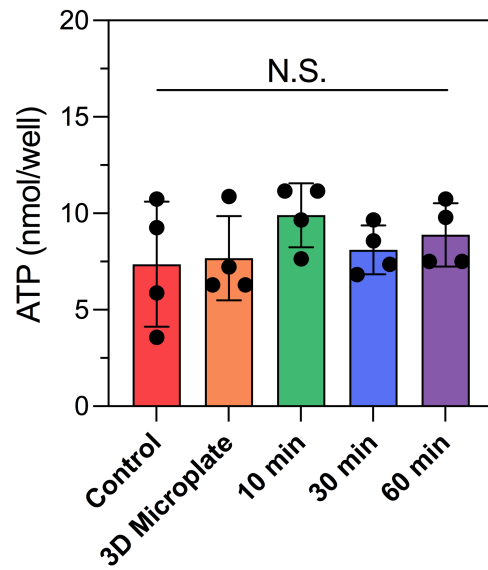

**Supplementary Figure 6** | The analysis of ATP concentrations of different groups after incubating for 4 days. Data are graphed as the mean  $\pm$  SD (n=4, biological repeats). The statistical analysis was performed using one-way ANOVA with Tukey's post-hoc test by GraphPad Prism 9.0. Source data are provided as a Source Data file.

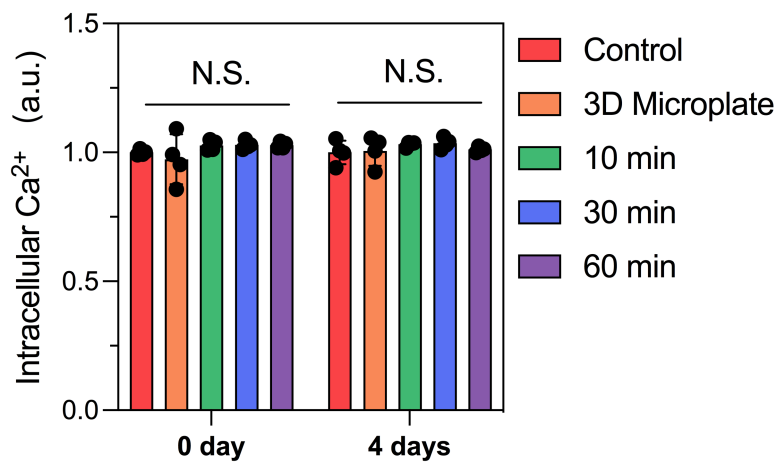

**Supplementary Figure 7** | The analysis of intracellular Ca<sup>2+</sup> concentrations of different groups after incubating for 4 days. Data are graphed as the mean  $\pm$  SD (n=4, biological repeats). The statistical analysis was performed using one-way ANOVA with Tukey's post-hoc test by GraphPad Prism 9.0. N.S.: not significant. Source data are provided as a Source Data file.



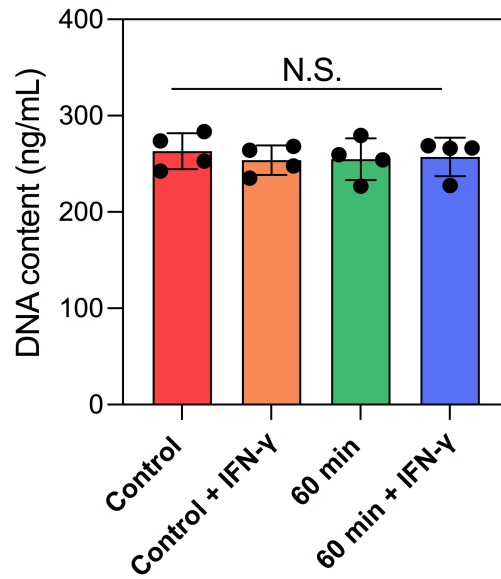

**Supplementary Figure 8** | CyQUANT™ Cell Proliferation Assay measuring the DNA contents of IFN- $\gamma$  primed MSCs from different groups and incubating for 4 days. Data are graphed as the mean  $\pm$  SD (n=4, biological repeats). The statistical analysis was performed using one-way ANOVA with Tukey's post-hoc test by GraphPad Prism 9.0. N.S.: not significant. Source data are provided as a Source Data file.

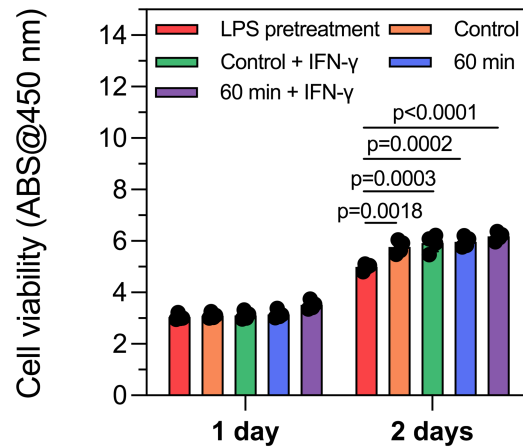

**Supplementary Figure 9** | CCK-8 assay measuring the viability of Human THP-1 cells from different groups after incubating for 1 and 2 days. Data are graphed as the mean  $\pm$  SD (n=4, biological repeats). The statistical analysis was performed using one-way ANOVA with Tukey's post-hoc test by GraphPad Prism 9.0. Source data are provided as a Source Data file.

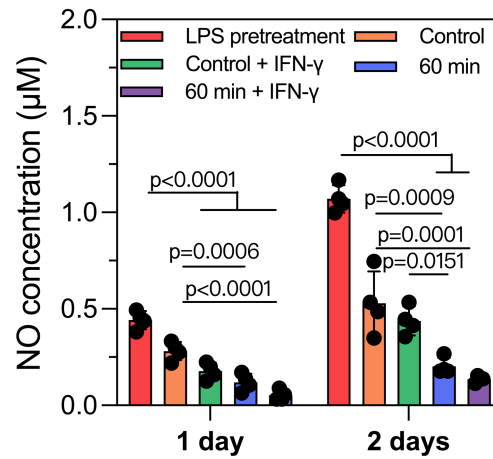

**Supplementary Figure 10** | The analysis of nitric oxide (NO) production of different groups after incubating for 1 and 2 days. Data are graphed as the mean  $\pm$  SD (n=4, biological repeats). The statistical analysis was performed using one-way ANOVA with Tukey's post-hoc test by GraphPad Prism 9.0. Source data are provided as a Source Data file.

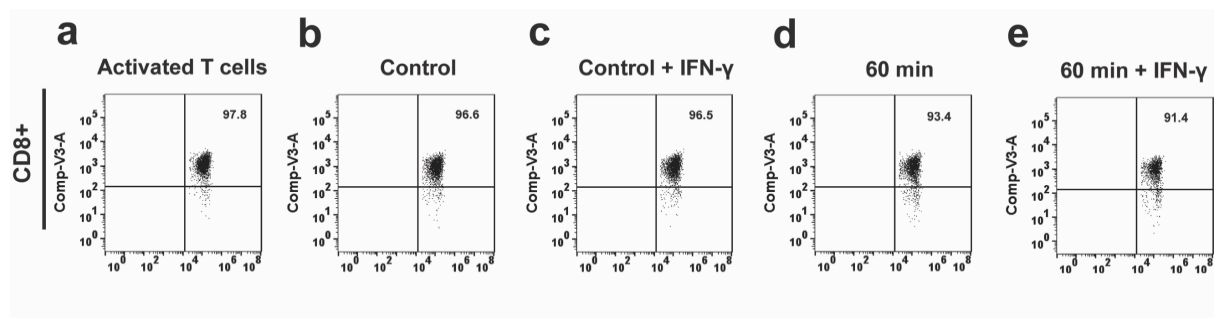

**Supplementary Figure 11** | Flow cytometry analysis measuring the percentage of CD8 positive T cells of each group after incubating with the conditional medium from MSCs for 3 days. a: Activated T cells, b: Control, c: Control + IFN- $\gamma$ , d: 60 min, e: 60 min + IFN- $\gamma$ . Source data are provided as a Source Data file.

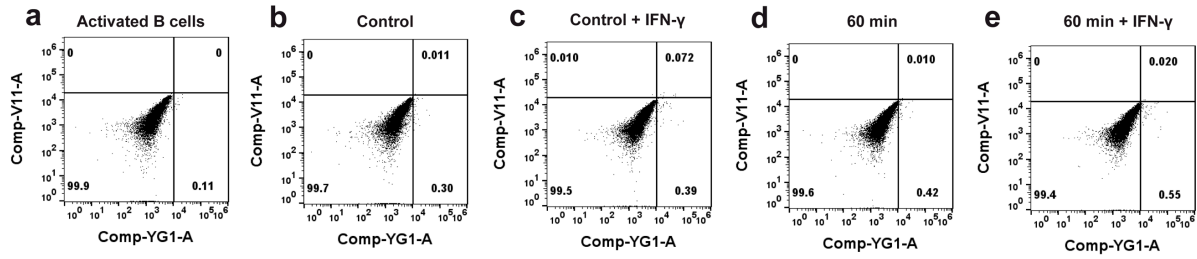

**Supplementary Figure 12 |** Flow cytometry analysis measuring the B cell apoptosis of each group after incubating with the conditional medium from MSCs for 7 days. a: Activated T cells, b: Control, c: Control + IFN- $\gamma$ , d: 60 min, e: 60 min + IFN- $\gamma$ . Source data are provided as a Source Data file.

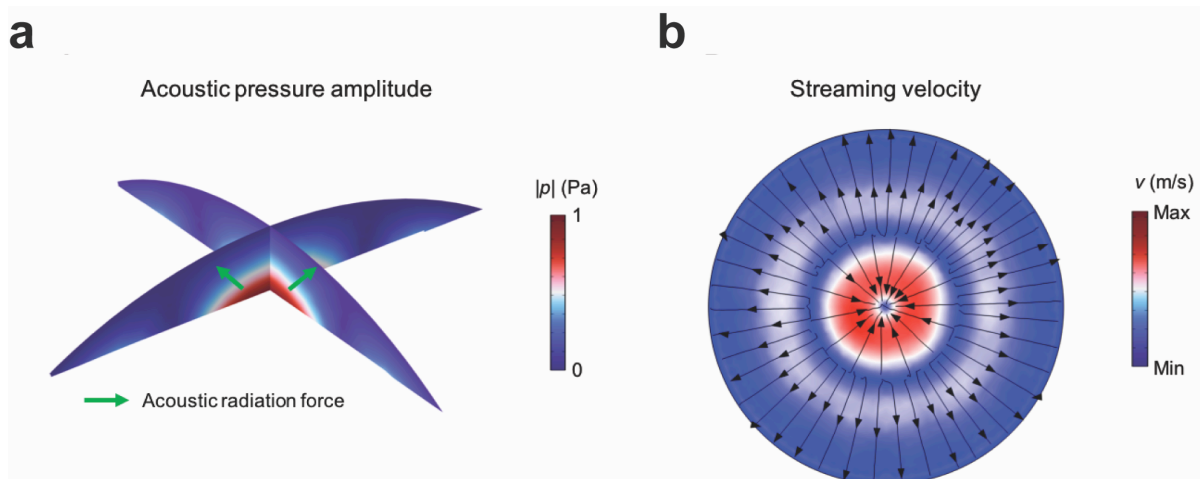

**Supplementary Figure 13** | Simulation results depict the acoustic pressure amplitude **(a)** and acoustic streaming velocity **(b)** on a cross-sectional plane near the bottom of the device.

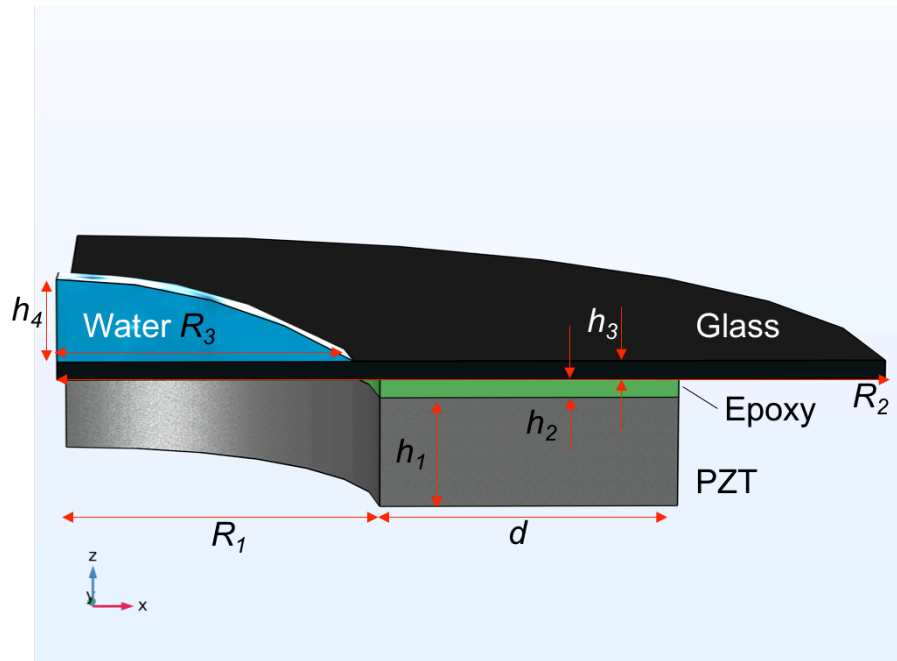

**Supplementary Figure 14** | Illustration of the geometry and dimensions of the simulation model. A fully coupled three-dimensional model was developed by coupling the acoustic pressure module and solid mechanics module to calculate the acoustic intensity distribution. The model setup consisted of a ring piezoelectric transducer (PZT) located at the base of a glass substrate, affixed with a thin layer of Epoxy. Positioned atop this glass substrate was a small droplet. The geometric parameters of the model can be found in Table 1 (main text).
